# Supplementary material for: Impact of Polypyridyl Ru Complexes on Angiogenesis—Contribution to Their Antimetastatic Activity
Source: MDPI journal article supplement (doi:10.3390/ijms23147708), 2022-07-12

## Supporting Information for

# Impact of Polypyridyl Ru Complexes on Angiogenesis— Contribution to Their Antimetastatic Activity

**Ilona Gurgul <sup>1</sup>, Olga Mazuryk <sup>1,\*</sup>, Kamila Stachyra <sup>2</sup>, Rafal Olszanecki <sup>2</sup>, Malgorzata Lekka <sup>3</sup>, Michal Lomzik <sup>1,4</sup>, Franck Suzenet <sup>5</sup>, Philippe C. Gros <sup>6</sup> and Malgorzata Brindell <sup>1,\*</sup>**

<sup>1</sup> Faculty of Chemistry, Jagiellonian University in Krakow, Gronostajowa 2, 30-387 Krakow, Poland; ilona.gurgul@uj.edu.pl (I.G.); michal.lomzik@chemia.uni.lodz.pl (M.L.)

<sup>2</sup> Chair of Pharmacology, Faculty of Medicine, Jagiellonian University Medical College, Grzegorzeczka 16, 31-531 Krakow, Poland; kamila.stachyra@uj.edu.pl (K.S.) rafal.olszanecki@uj.edu.pl (R.O.)

<sup>3</sup> Department of Biophysical Microstructures, Institute of Nuclear Physics, Polish Academy of Sciences, PL-31342 Krakow, Poland; malgorzata.lekka@ifj.edu.pl

<sup>4</sup> Department of Organic Chemistry, Faculty of Chemistry, University of Łódź, ul. Tamka 12, 91-403 Łódź, Poland

<sup>5</sup> Institute of Organic and Analytical Chemistry, University of Orléans, UMR-CNRS 7311, rue de Chartres, BP 6759, CEDEX 2, 45067 Orléans, France; franck.suzenet@univ-orleans.fr

<sup>6</sup> Université de Lorraine, CNRS, L2CM, F-54000 Nancy, France; philippe.gros@univ-lorraine.fr

\* Correspondence: olga.mazuryk@uj.edu.pl (O.M.); malgorzata.brindell@uj.edu.pl (M.B.)

### Purity and identity confirmation

HPLC - HPLC-DAD Shimadzu LC-2030C, Shimadzu Europa GmbH, Duisburg, Germany

HRMS – micrOTOF-Q mass spectrometer, Bruker Daltonics, Billerica, MA, USA

<sup>1</sup>H NMR 400 MHz spectrometer, Bruker DRX400, Bruker Cooperation, Billerica, MA, USA

| Compound                                                                           | HPLC+HRMS or NMR+HRMS analysis                                                                                                                                                                                                                          |
|------------------------------------------------------------------------------------|---------------------------------------------------------------------------------------------------------------------------------------------------------------------------------------------------------------------------------------------------------|
| 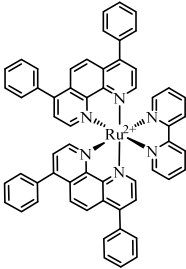  | <p data-bbox="600 465 1394 528">HRMS: m/z: Calculated for [C<sub>70</sub>H<sub>52</sub>N<sub>10</sub>ORu]: m/z 458.1190, found 459.1188.</p>                          |
|  | <p data-bbox="600 893 1414 956">HRMS: m/z: Calculated for [C<sub>64</sub>H<sub>47</sub>N<sub>9</sub>O<sub>2</sub>Ru]<sup>2+</sup>: m/z 537.6451 found: 537.6450</p>  |

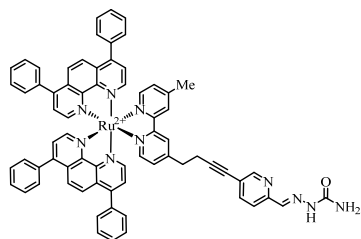

HRMS:  $m/z$ : Calculated for  $[C_{70}H_{52}N_{10}ORu]^{2+}$ :  $m/z$  575.1679, found 575.1658.

$^1H$  NMR (600 MHz,  $CD_3CN$ )  $\delta$  2.55 (s, 3H), 2.95 (t,  $J=6$  Hz, 2H), 3.13 (t,  $J=6$  Hz, 2H), 7.04 (s, 1H), 7.22 (d,  $J=6$  Hz, 1H), 7.37 (dd,  $J=15.6$  Hz, 6 Hz, 2H), 7.57-7.63 (m, 20H), 7.67 (d,  $J=5.4$  Hz, 2H), 7.73 (dd,  $J=5.4$  and 2.4 Hz, 2H), 7.79 (t,  $J=5.4$  Hz, 1H), 8.13-8.20 (m, 6H), 8.23 (d,  $J=5.4$  Hz, 1H), 8.26 (d,  $J=5.4$  Hz, 1H), 8.33 (d,  $J=5.4$  and 3.6 Hz, 1H), 8.80 (d,  $J=12.6$  Hz, 1H), 8.90 (d,  $J=12.6$  Hz, 1H) ppm

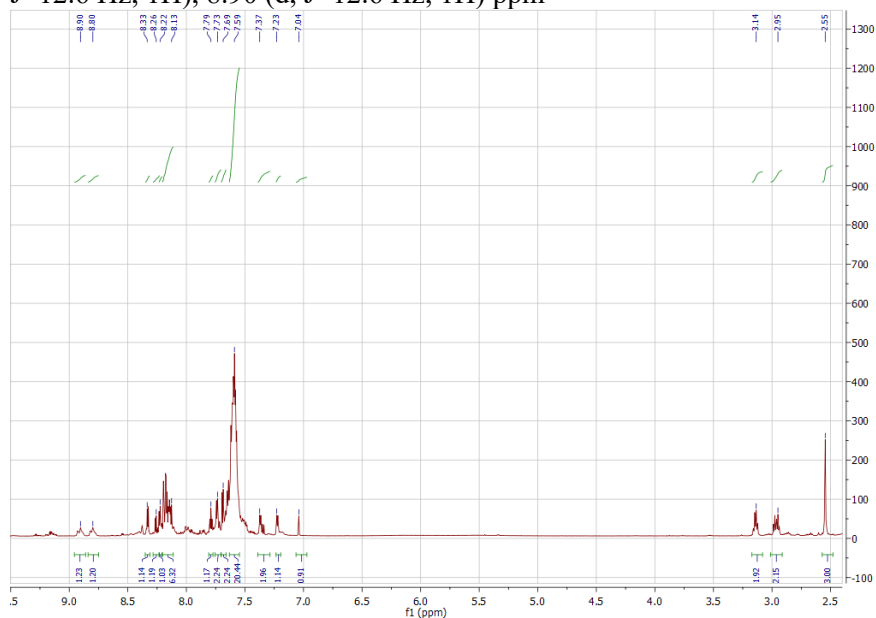

Supplement: s1 [file s1]
